# Supplementary material
Source: MDPI journal article supplement (https://www.mdpi.com/2073-4344/13/10/1370)
Supplement: s1 [file s1]

# Aminocyclopropenium as a New Class of Hydrogen Bonding Catalyst in Friedel–Crafts Alkylation

Xuesuo Ma <sup>1</sup>, Jiayi Xu <sup>2</sup>, Jingjing Liu <sup>2</sup>, Jun He <sup>2</sup>, Tong Chang <sup>2</sup>, Qingbiao Yang <sup>2</sup>, Ning Li <sup>2</sup>, Dong Qian <sup>2</sup> and Zhenjiang Li <sup>2,\*</sup>

<sup>1</sup> Hangzhou Seemore New Material Technology Co., Ltd., 1589 Xinggang Road, Hangzhou 311300, China; hzseemore@163.com

<sup>2</sup> State Key Laboratory Materials-Oriented Chemical Engineering, College of Biotechnology and Pharmaceutical Engineering, Nanjing Tech University, 30 Puzhu Road South, Nanjing 211816, China; jiayi.xu@kaust.edu.sa (J.X.); jingjing.liu@kaust.edu.sa (J.L.); he.june@njtech.edu.cn (J.H.); changtong@njtech.edu.cn (T.C.); yangqingbiao@njtech.edu.cn (Q.Y.); lining@njtech.edu.cn (N.L.); qiandong@njtech.edu.cn (D.Q.)

\* Correspondence: zjli@njtech.edu.cn; Tel.: +86-25-5813-9926

Table of Contents

General Information 1

Comparsion of organocatalysts used in the F–C alkylation of indole and nitroalkene..... 2

Characterization Data ..... 2

NMR Spectra of Compounds ..... 5

X-ray crystal structure of TPAC·Cl ..... 15

Reference..... 16

## General Information

NMR spectra were recorded at room temperature on a Bruker AVANCE 400 spectrometer in deuterated solvents as noted. Chemical shifts ( $\delta$ ) are reported in parts per million (ppm) relative to a residual solvent resonance as the internal standard ( $^1\text{H}$   $\delta$  7.26 for  $\text{CDCl}_3$ ,  $\delta$  2.50 for  $\text{DMSO}-d_6$ ;  $^{13}\text{C}$   $\delta$  77.16 for  $\text{CDCl}_3$ ,  $\delta$  39.52 for  $\text{DMSO}-d_6$ ). NMR peak multiplicities are abbreviated as follows: brs = broad signal, s = singlet, d = doublet, t = triplet, q = quartet, sept = septet, and m = multiplet. High-resolution mass spectra (HRMS) were recorded on an Agilent Technologies 6520 Q-TOF mass spectrometer using electrospray ionization time-of-flight (ESI-TOF) reflectron experiments. XRD data were obtained on X-ray diffractometer (Bruker SMART APEX II).

All operations were performed using standard Schlenk techniques with an argon atmosphere to reduce exposure to water. Dichloromethane was distilled over  $\text{CaH}_2$  under an argon atmosphere, and further dried over 3 Å molecular sieve pellets for 48 h before use. Benzene was purified by refluxing on sodium under an argon atmosphere, and further dried over 3 Å molecular sieve pellets for 48 h before use.

Catalysts **TPAC·Cl**, **TPAC·F**, **TDAC·Cl**, and **TDAC·F** were prepared according to the reported procedure<sup>1</sup>. Catalysts **TBA·Cl** and **TBA·F** were purchased from Sigma Aldrich without additional purification.

Reaction conditions had been screened in the initial attempts to verify the feasibility of this reaction. In pre-experiments, low catalyst loading was found that could not realize the Friedel-Crafts alkylation reaction of indoles with nitroalkenes. To ensure that the reaction is homogeneous, the solubility of the solvent must be carefully considered. Dichloromethane was found to be the optimal solvent after the experiment examination.

### Comparison of organocatalysts used in the F–C alkylation of indole and nitroalkene

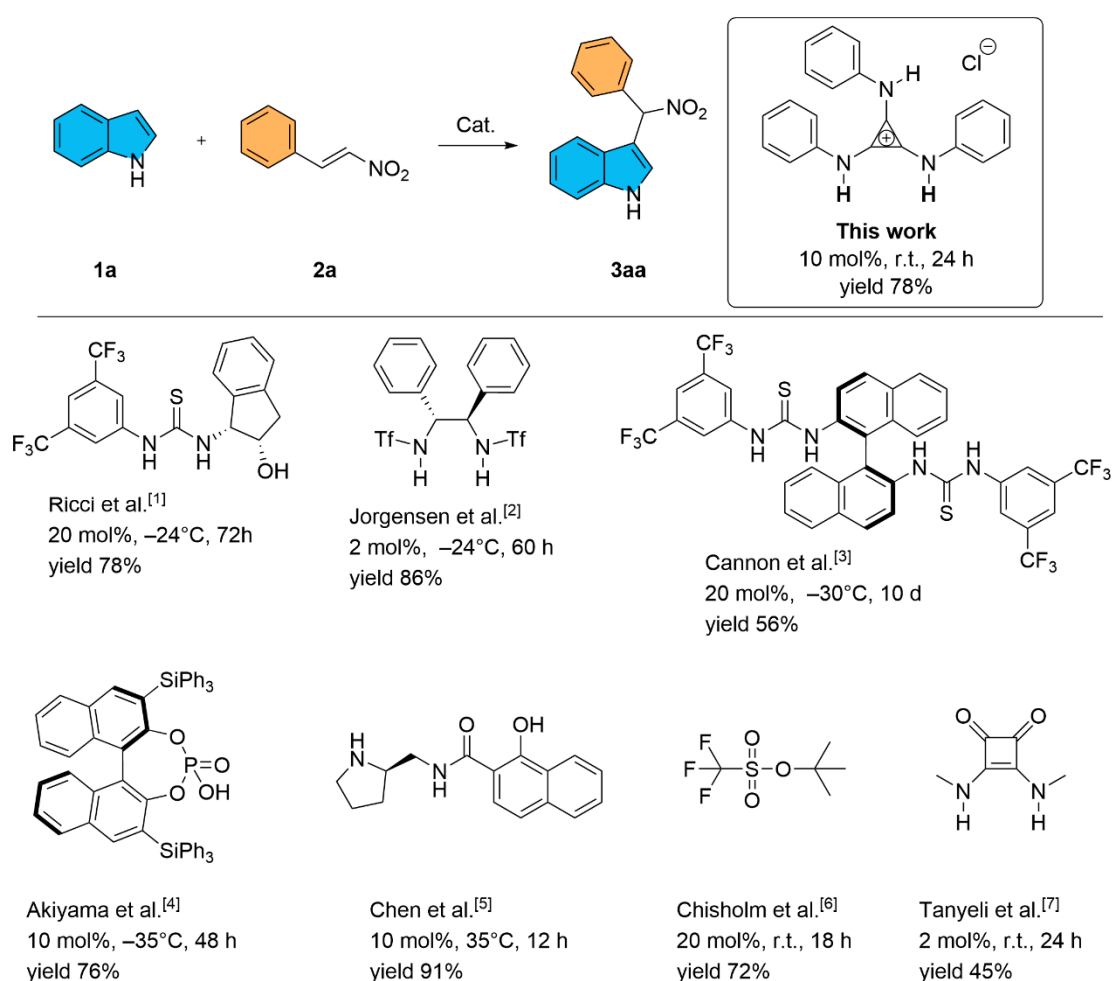

**Scheme S1.** A comparison between organocatalysts utilized to catalyze the F–C alkylation of indole and nitroalkene.

A comparison between related organocatalysts utilized to catalyze the F–C alkylation reaction of indole and nitroalkene was shown in Scheme S1. The amino-cyclopropenium ion pair could facilitate the coupling of indole to nitroalkene at room temperature with 10 mol% catalyst loading in 24 h, a 78% yield of the corresponding product was given.

### Characterization Data

#### 3. -(2-Nitro-1-phenylethyl)-1H-indole (3aa)

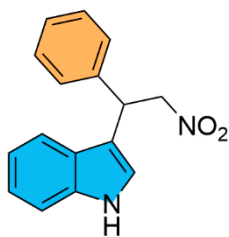

A colorless oil was obtained after purification by flash column chromatography (*n*-hexane-EtOAc, 10:1): 0.21 g, 78 % yield;  $^1\text{H}$  NMR (400 MHz,  $\text{CDCl}_3$ )  $\delta$  8.02 (brs, 1H), 7.37(d,  $J$  = 8.0 Hz, 1H), 7.29–7.18 (m, 6H), 7.12 (m, 1H), 7.02 – 6.95 (m, 2H), 5.12 (t,  $J$  = 7.9 Hz, 1H), 4.99 (dd,  $J$  = 12.5, 7.6 Hz, 1H), 4.89 (dd,  $J$  = 12.5, 8.4 Hz, 1H);  $^{13}\text{C}$  NMR (100 MHz,  $\text{CDCl}_3$ )  $\delta$  139.3, 136.6, 129.0, 127.9, 127.7, 126.2, 122.8, 121.7, 120.0, 119.0, 114.5, 111.5, 79.6, 41.7; HRMS (ESI-TOF)  $m/z$ :  $[\text{M} + \text{H}]^+$  calcd for  $\text{C}_{16}\text{H}_{14}\text{N}_2\text{O}_2\text{H}$  267.1128; Found 267.1127.

## 2. -Methyl-3-(2-nitro-1-phenylethyl)-1H-indole (3ba)

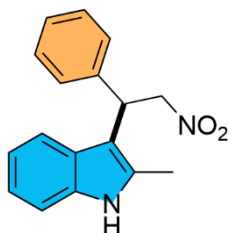

A colorless oil was obtained after purification by flash column chromatography (*n*-hexane-EtOAc, 9:1): 0.24 g, 86 % yield;  $^1\text{H}$  NMR (400 MHz,  $\text{CDCl}_3$ )  $\delta$  7.80 (brs, 1H), 7.32 (d,  $J$  = 7.9 Hz, 1H), 7.29 – 7.16 (m, 6H), 7.08 – 7.04 (m, 1H), 6.99 – 6.96 (m, 1H), 5.20 – 5.12 (m, 2H), 5.10 – 5.04 (m, 1H), 2.34 (s, 3H).  $^{13}\text{C}$  NMR (100 MHz,  $\text{CDCl}_3$ )  $\delta$  139.6, 135.3, 132.9, 128.9, 127.4, 127.2, 127.0, 121.5, 119.9, 118.7, 110.8, 109.0, 78.8, 40.6, 12.2; HRMS (ESI-TOF)  $m/z$ :  $[\text{M} + \text{H}]^+$  calcd for  $\text{C}_{17}\text{H}_{16}\text{N}_2\text{O}_2\text{H}$  281.1285; Found 281.1274.

## 5. -Methoxy-3-(2-nitro-1-phenylethyl)-1H-indole (3ca)

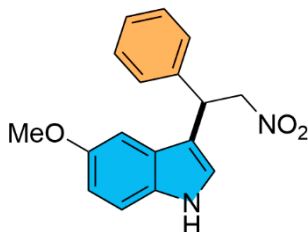

A white solid was obtained after purification by flash column chromatography (*n*-hexane-EtOAc, 9:1): 0.26 g, 88 % yield; m.p. 138.2 – 140.1 °C;  $^1\text{H}$  NMR (400 MHz,  $\text{CDCl}_3$ )  $\delta$  7.92 (brs, 1H), 7.27 – 7.15 (m, 6H), 6.92–6.91 (m, 1H), 6.79 – 6.76 (m, 2H), 5.06 (t,  $J$  = 7.9 Hz, 1H), 4.97 (dd,  $J$  = 12.4, 7.5 Hz, 1H), 4.86 (dd,  $J$  = 12.4, 8.4 Hz, 1H), 3.69 (s, 3H);  $^{13}\text{C}$  NMR (100 MHz,  $\text{CDCl}_3$ )  $\delta$  154.3, 139.3, 131.7, 129.1, 127.9, 127.7, 126.7, 122.4, 114.3, 112.9, 112.2, 101.0, 79.6, 56.0, 41.7; HRMS (ESI-TOF)  $m/z$ :  $[\text{M} + \text{H}]^+$  calcd for  $\text{C}_{17}\text{H}_{16}\text{N}_2\text{O}_3\text{H}$  297.1234; Found 297.1267.

## 5. -Chloro-3-(2-nitro-1-phenylethyl)-1H-indole (3da)

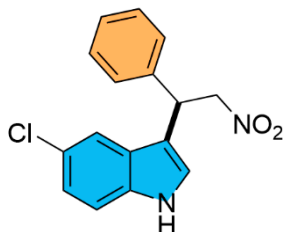

A colorless oil was obtained after purification by flash column chromatography (*n*-hexane-EtOAc, 9:1): 0.16 g, 52% yield;  $^1\text{H}$  NMR (400 MHz,  $\text{CDCl}_3$ )  $\delta$  8.08 (brs, 1H), 7.32 (d,  $J$  = 1.6 Hz, 1H), 7.30 – 7.19 (m, 6H), 7.08 (dd,  $J$  = 8.6, 1.9 Hz, 1H), 7.03 (d,  $J$  = 2.1 Hz, 1H), 5.07 (t,  $J$  = 8.0 Hz, 1H), 4.99 – 4.94 (m, 1H), 4.89 – 4.84 (m, 1H);  $^{13}\text{C}$  NMR (100 MHz,  $\text{CDCl}_3$ )  $\delta$  138.9, 135.0, 129.2, 127.9, 127.8, 127.4, 125.9, 123.3, 123.0, 118.6, 114.3, 112.5, 79.5, 41.5; HRMS (ESI-TOF)  $m/z$ :  $[\text{M} + \text{H}]^+$  calcd for  $\text{C}_{16}\text{H}_{13}\text{ClN}_2\text{O}_2\text{H}$  301.0738; Found 301.0765.

## 7. -Methyl-3-(2-nitro-1-phenylethyl)-1H-indole (3ea)

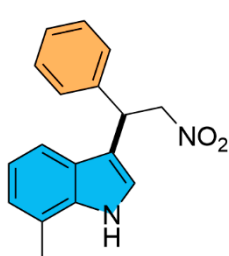

A colorless oil was obtained after purification by flash column chromatography (*n*-hexane-EtOAc, 9:1): 0.16 g, 57 % yield;  $^1\text{H}$  NMR (400 MHz,  $\text{CDCl}_3$ )  $\delta$  7.92 (brs, 1H), 7.28 – 7.17 (m, 6H), 6.96 – 6.93 (m, 3H), 5.13–5.09 (m, 1H), 4.99 (dd,  $J$  = 12.5, 7.6 Hz, 1H), 4.87 (dd,  $J$  = 12.5, 8.3 Hz, 1H), 2.38 (s, 3H);  $^{13}\text{C}$  NMR (100 MHz,  $\text{CDCl}_3$ )  $\delta$  139.4, 136.2, 129.0, 127.9, 127.6, 125.8, 123.3, 121.4, 120.7, 120.3, 116.8, 115.0, 79.7, 41.8, 16.6; HRMS (ESI-TOF)  $m/z$ :  $[\text{M} + \text{H}]^+$  calcd for  $\text{C}_{17}\text{H}_{16}\text{N}_2\text{O}_2\text{H}$  281.1285; Found 281.1276.

## 3. -(2-nitro-1-(*p*-tolyl)ethyl)-1H-indole (3ab)

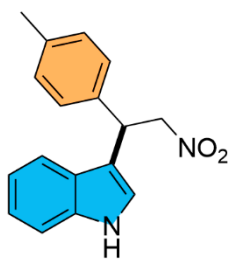

A colorless oil was obtained after purification by flash column chromatography (n-hexane-EtOAc, 9:1): 0.09 g, 33 % yield;  $^1\text{H}$  NMR (400 MHz,  $\text{CDCl}_3$ )  $\delta$  8.09 (brs, 1H), 7.51 (dd,  $J$  = 8.0, 1.0 Hz, 1H), 7.39 – 7.37 (m, 1H), 7.29 – 7.22 (m, 3H), 7.18 – 7.11 (m, 3H), 7.04 (m, 1H), 5.20 (t,  $J$  = 8.0 Hz, 1H), 5.09 (dd,  $J$  = 12.4, 7.6 Hz, 1H), 4.96 (dd,  $J$  = 12.4, 8.4 Hz, 1H), 2.36 (s, 3H);  $^{13}\text{C}$  NMR (100 MHz,  $\text{CDCl}_3$ )  $\delta$  137.3, 136.6, 136.3, 129.7, 127.7, 126.2, 122.8, 121.7, 120.0, 119.1, 114.7, 111.5, 79.8, 41.3, 21.2; HRMS (ESI-TOF)  $m/z$ :  $[\text{M} + \text{H}]^+$  calcd for  $\text{C}_{17}\text{H}_{16}\text{N}_2\text{O}_2\text{H}$  281.1285; Found 281.1274.

### 3. -(1-(4-methoxyphenyl)-2-nitroethyl)-1H-indole (3ac)

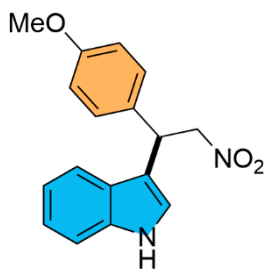

A white solid was obtained after purification by flash column chromatography (n-hexane-EtOAc, 9:1): 0.16 g, 55 % yield; m.p. 148.2 – 150.1 °C;  $^1\text{H}$  NMR (400 MHz,  $\text{CDCl}_3$ )  $\delta$  8.08 (brs, 1H), 7.44 (dd,  $J$  = 7.9, 1.1 Hz, 1H), 7.36 (dt,  $J$  = 8.2, 1.0 Hz, 1H), 7.26 – 7.18 (m, 3H), 7.10 – 7.02 (m, 2H), 6.86 – 6.84 (m, 1H), 5.14 (t,  $J$  = 8.0 Hz, 1H), 5.05 (dd,  $J$  = 12.2, 7.5 Hz, 1H), 4.90 (dd,  $J$  = 12.2, 8.4 Hz, 1H), 3.78 (s, 3H);  $^{13}\text{C}$  NMR (100 MHz,  $\text{CDCl}_3$ )  $\delta$  159.1, 136.7, 131.3, 129.0, 126.3, 122.8, 121.6, 120.1, 119.2, 115.0, 114.4, 111.5, 79.9, 55.4, 41.0; HRMS (ESI-TOF)  $m/z$ :  $[\text{M} + \text{H}]^+$  calcd for  $\text{C}_{17}\text{H}_{16}\text{N}_2\text{O}_3\text{H}$  297.1234; Found 297.1267.

### 3. -(2-Nitro-1-thiophen-2-yl-ethyl)-1H-indole (3ad)

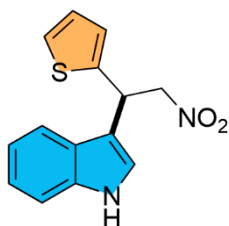

A colorless oil was obtained after purification by flash column chromatography (n-hexane-EtOAc, 9:1): 0.19 g, 71 % yield;  $^1\text{H}$  NMR (400 MHz,  $\text{CDCl}_3$ )  $\delta$  8.14 (br s, 1H), 7.61 – 7.59 (m, 1H), 7.41–7.39 (m, 1H), 7.32 – 7.18 (m, 3H), 7.09 – 7.00 (m, 3H), 5.53 (t,  $J$  = 7.9 Hz, 1H), 5.12–5.02 (m, 2H);  $^{13}\text{C}$  NMR (100 MHz,  $\text{CDCl}_3$ )  $\delta$  143.1, 136.5, 127.1, 125.8, 125.4, 125.0, 122.9, 122.1, 120.2, 118.9, 114.2, 111.6, 80.1, 37.1; HRMS (ESI-TOF)  $m/z$ :  $[\text{M} + \text{H}]^+$  calcd for  $\text{C}_{14}\text{H}_{12}\text{N}_2\text{O}_2\text{SH}$  273.0692; Found 273.0645.

### Tri(phenylamino)cyclopropenium chloride **TPAC·Cl**

$^1\text{H}$  NMR (400 MHz,  $\text{DMSO}-d_6$ )  $\delta$  11.1 (s, 3H), 7.48 – 7.41 (m, 6H), 7.36 – 7.27 (m, 6H), 7.22 – 7.16 (m, 3H).  $^{13}\text{C}$  NMR (101 MHz,  $\text{DMSO}-d_6$ )  $\delta$  139.28, 130.22, 124.48, 118.47, 113.32. HRMS (ESI-ToF)  $m/z$   $[\text{M}]^+$  calcd for  $\text{C}_{21}\text{H}_{18}\text{N}_3$  312.1495, found 312.1497. The spectral data were consistent with values reported in the literature<sup>8</sup>.

### Tris(dimethylamino)cyclopropenium chloride **TDAC·Cl**

$^1\text{H}$  NMR (400 MHz, Chloroform- $d$ )  $\delta$  3.19 (s, 18H).  $^{13}\text{C}$  NMR (101 MHz, Chloroform- $d$ )  $\delta$  117.81, 42.53. HRMS (ESI-TOF)  $m/z$   $[\text{M}]^+$  calcd for  $\text{C}_9\text{H}_{18}\text{N}_3$  168.1495, found 168.1434. The spectral data were consistent with values reported in the literature<sup>8</sup>.

## NMR Spectra of Compounds

Copies of NMR spectra of catalysts

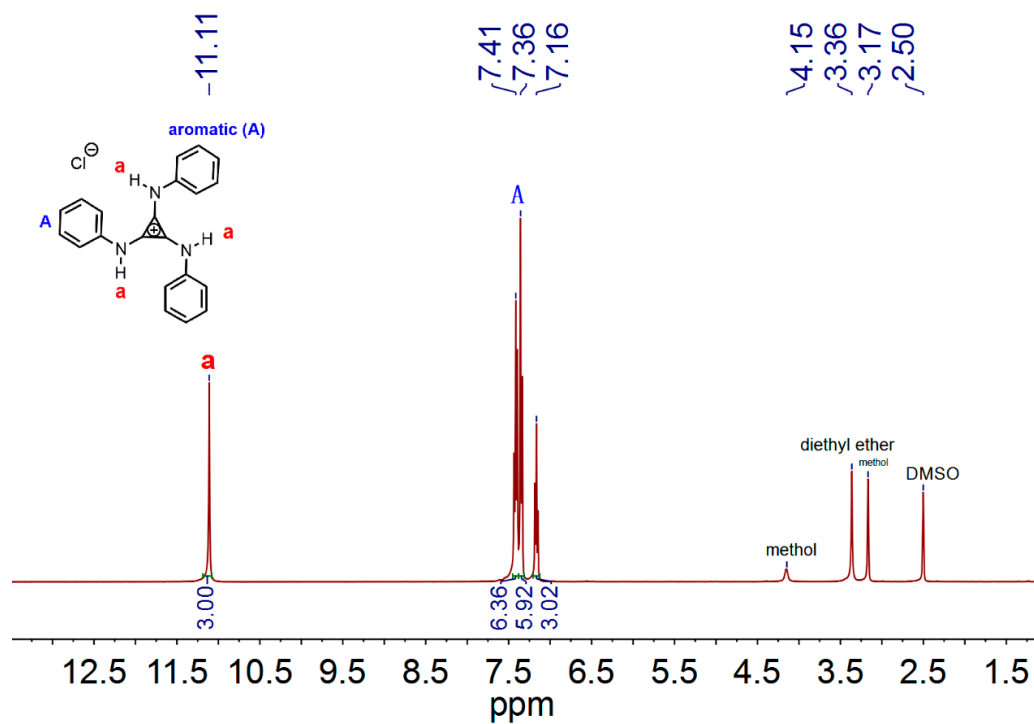

<sup>1</sup>H NMR Spectrum of Compound TPAC-Cl

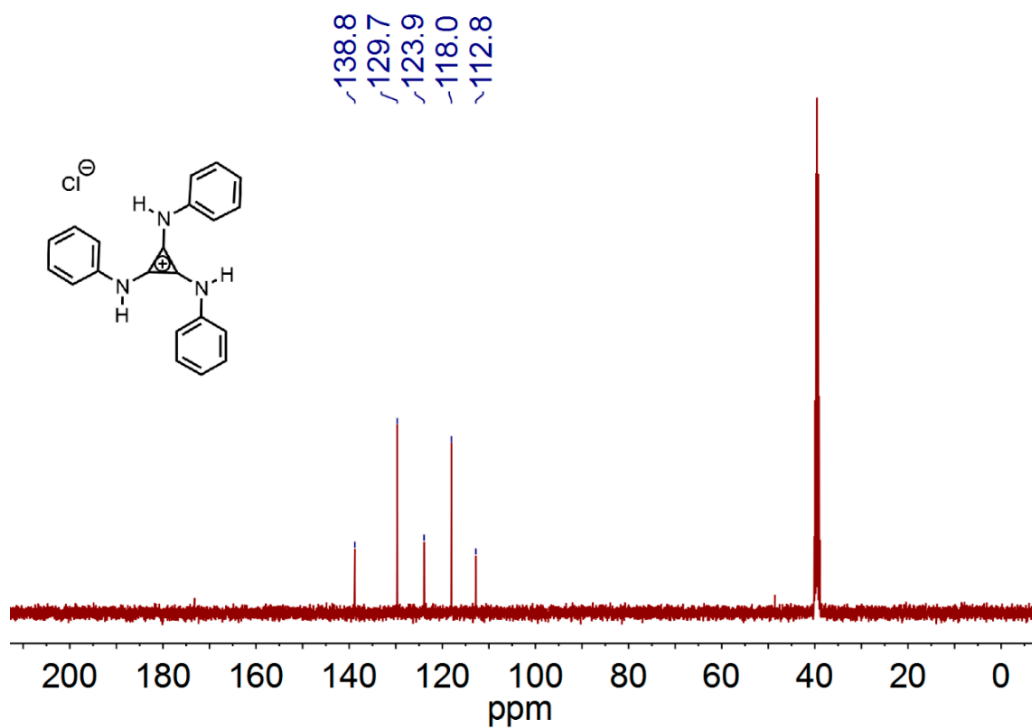

<sup>13</sup>C NMR Spectrum of Compound TPAC-Cl

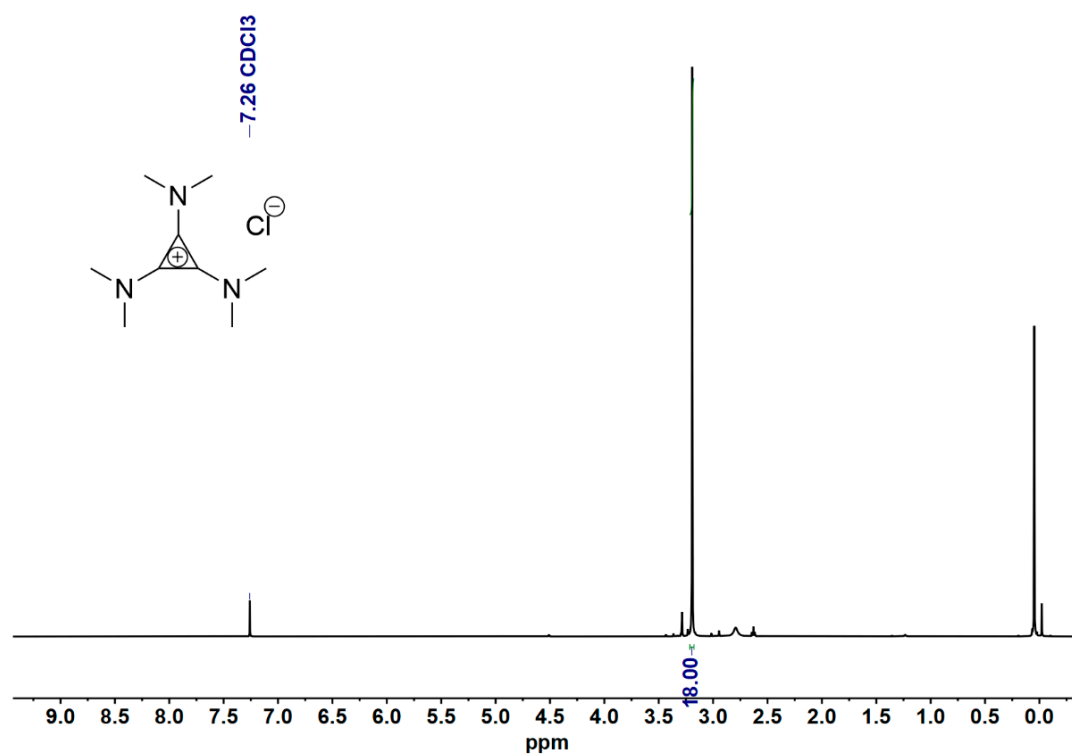<sup>1</sup>H NMR Spectrum of Compound **TPAC-Cl**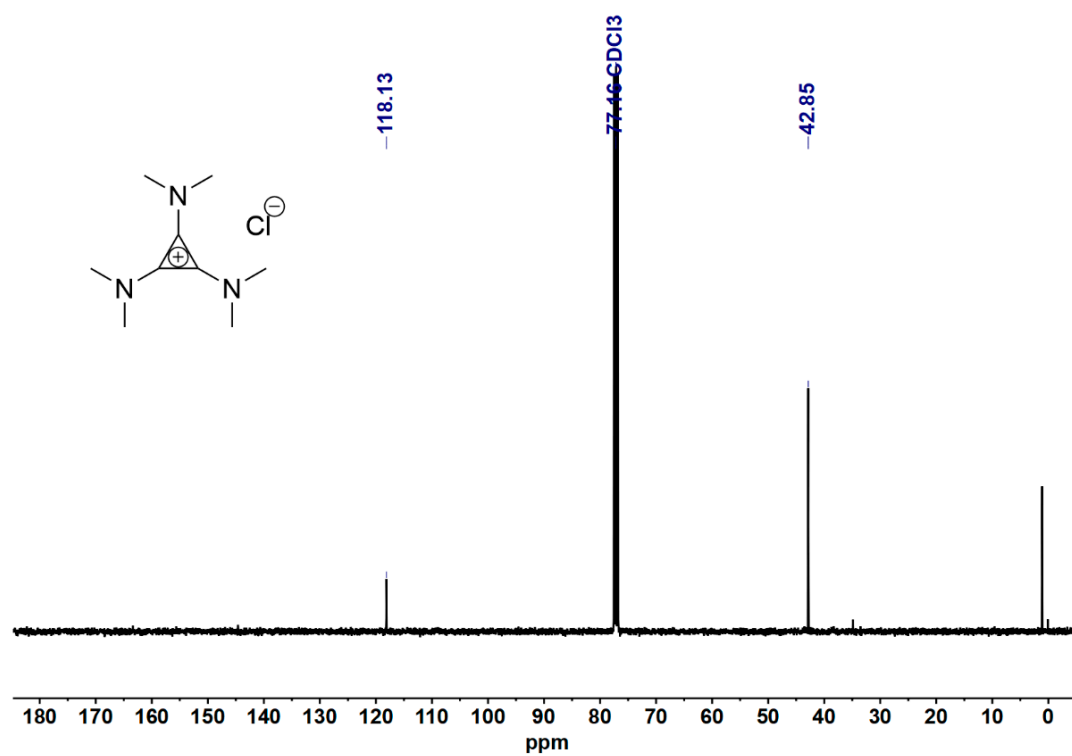<sup>13</sup>C NMR Spectrum of Compound **TPAC-Cl**

## Copies of NMR spectra of products

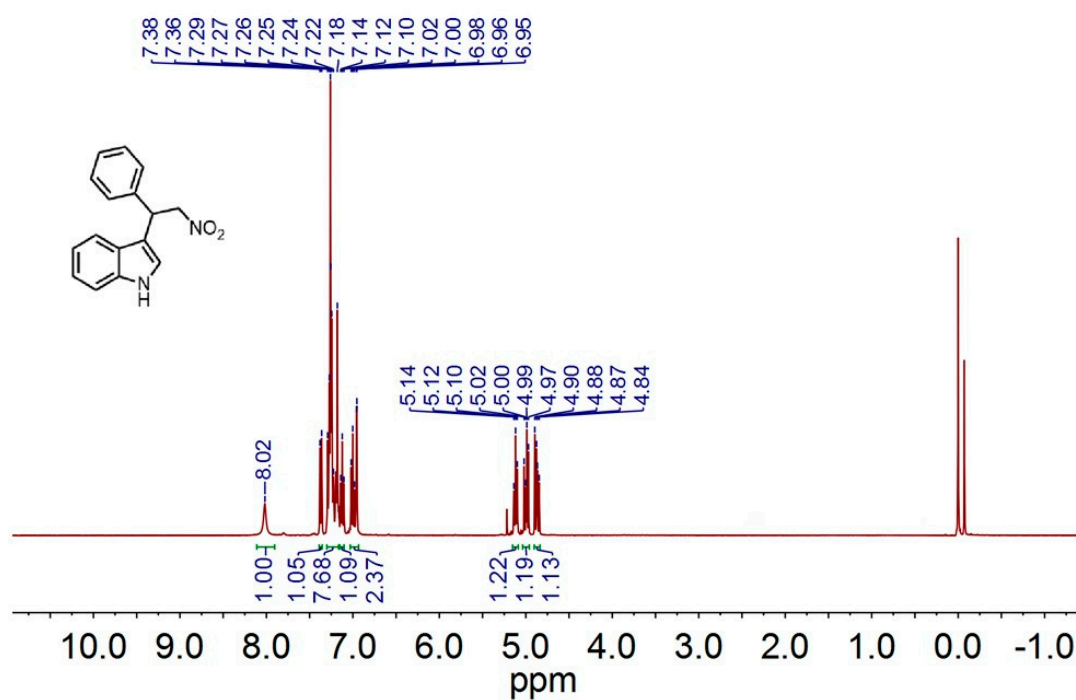<sup>1</sup>H NMR Spectrum of Compound **3aa**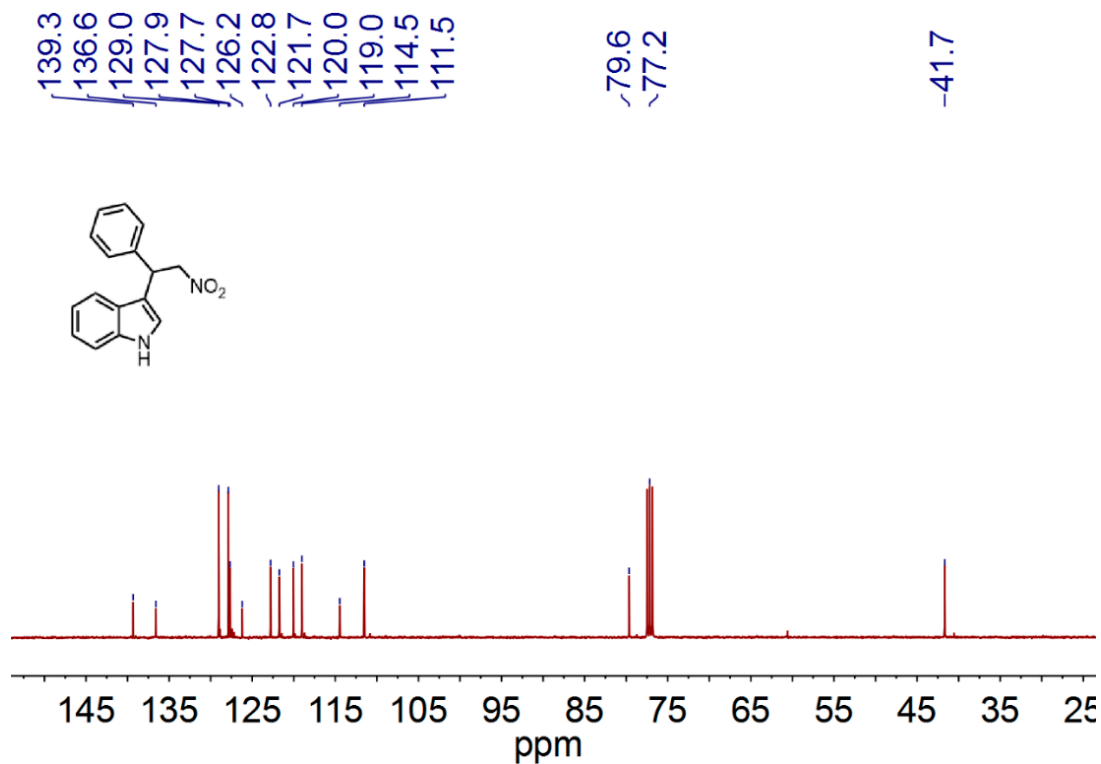<sup>13</sup>C NMR Spectrum of Compound **3aa**

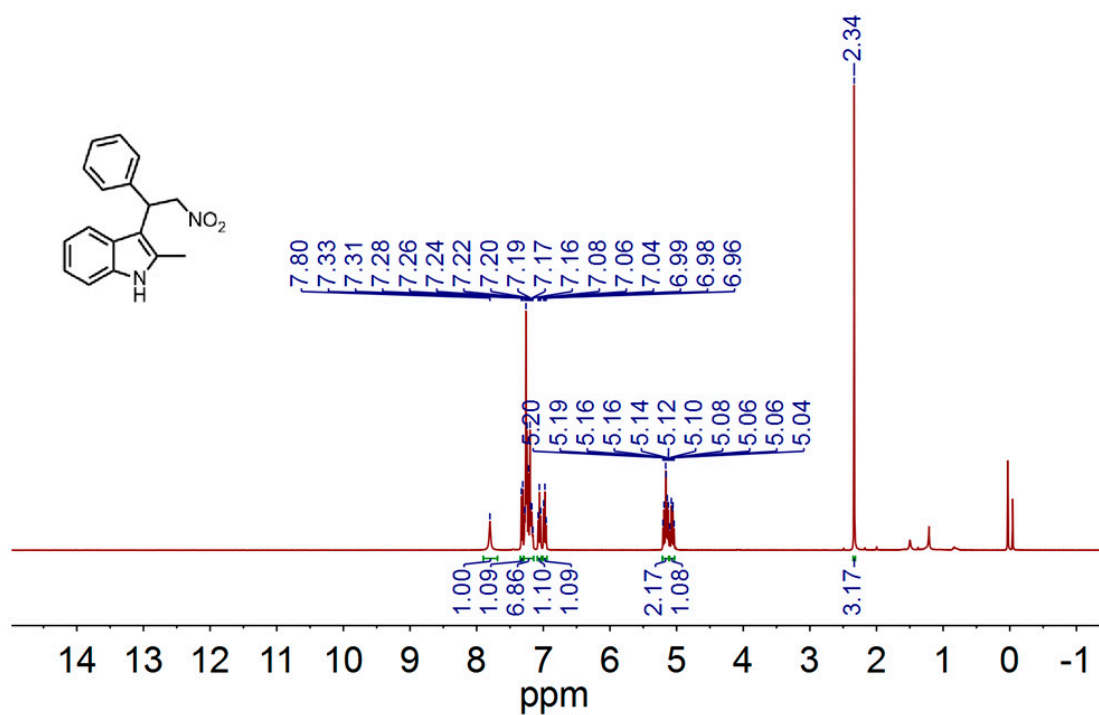

<sup>1</sup>H NMR Spectrum of Compound **3ba**

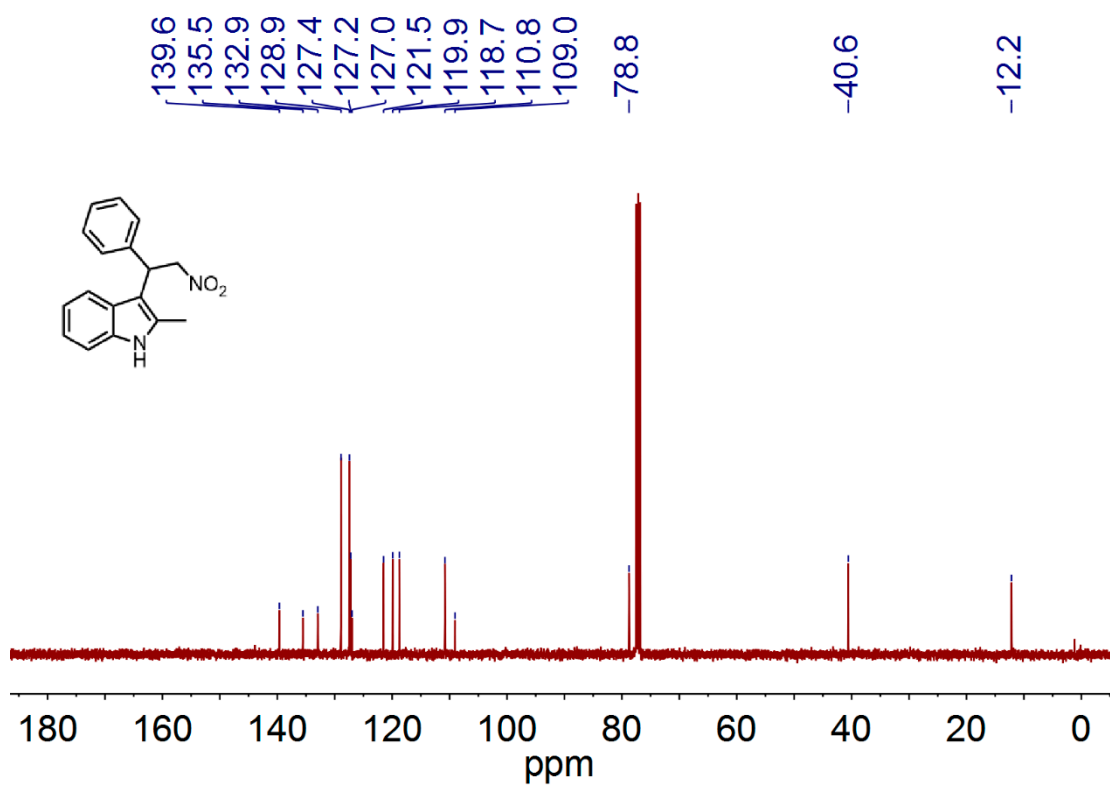

<sup>13</sup>C NMR Spectrum of Compound **3ba**



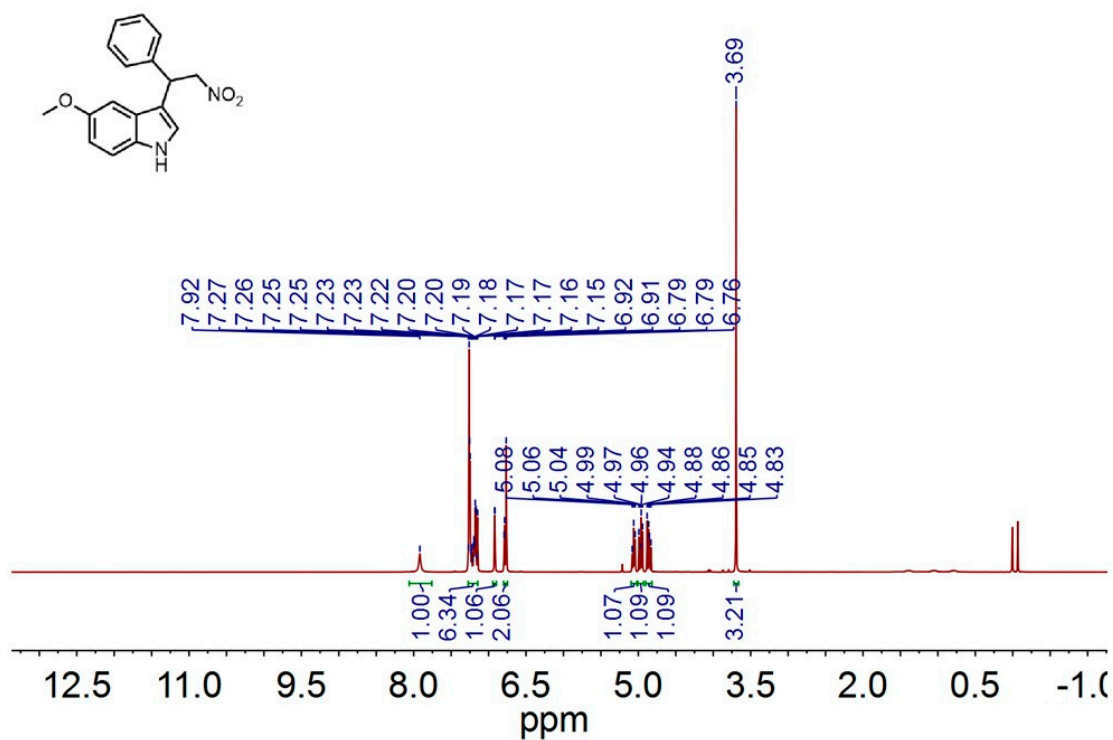<sup>1</sup>H NMR Spectrum of Compound **3ca**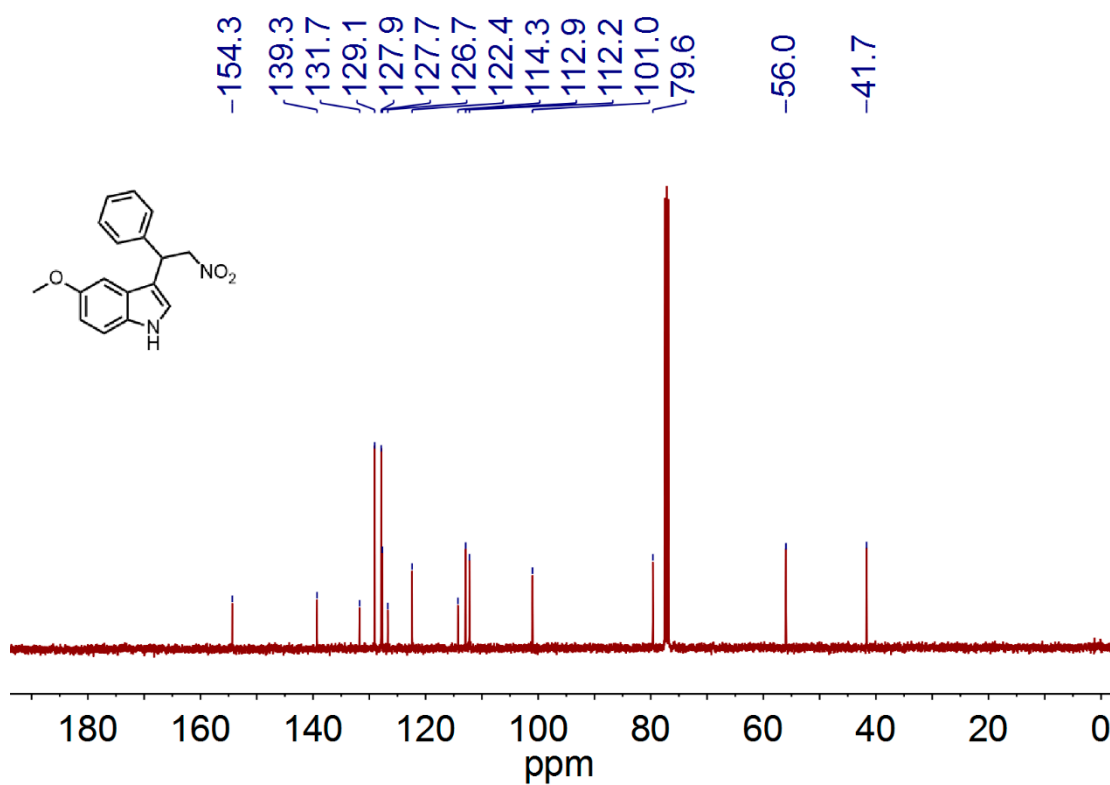<sup>13</sup>C NMR Spectrum of Compound **3ca**

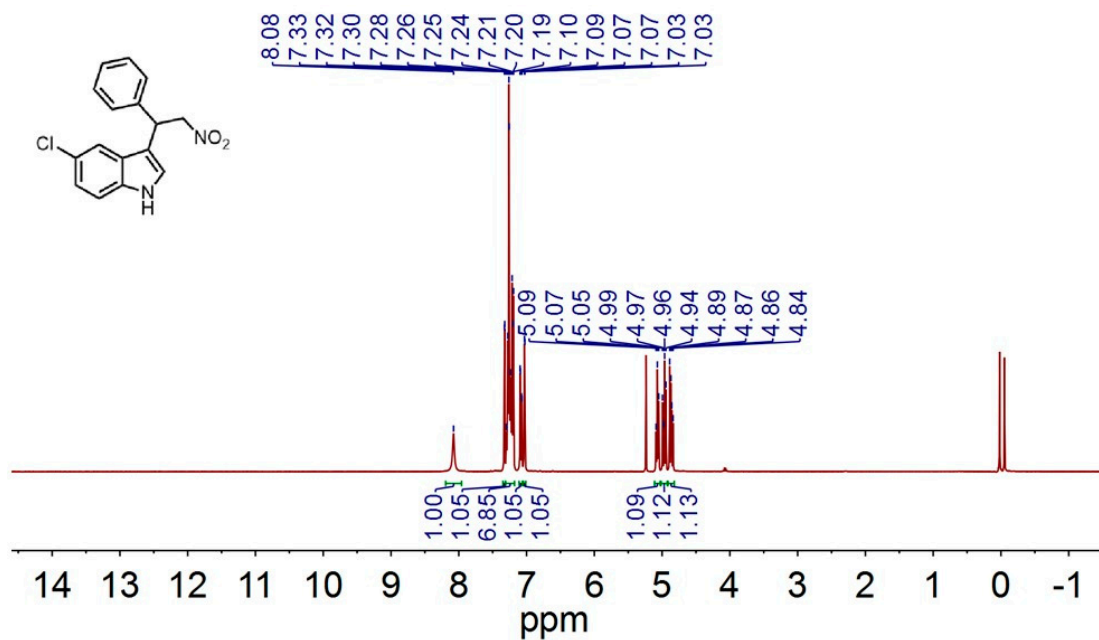<sup>1</sup>H NMR Spectrum of Compound **3da**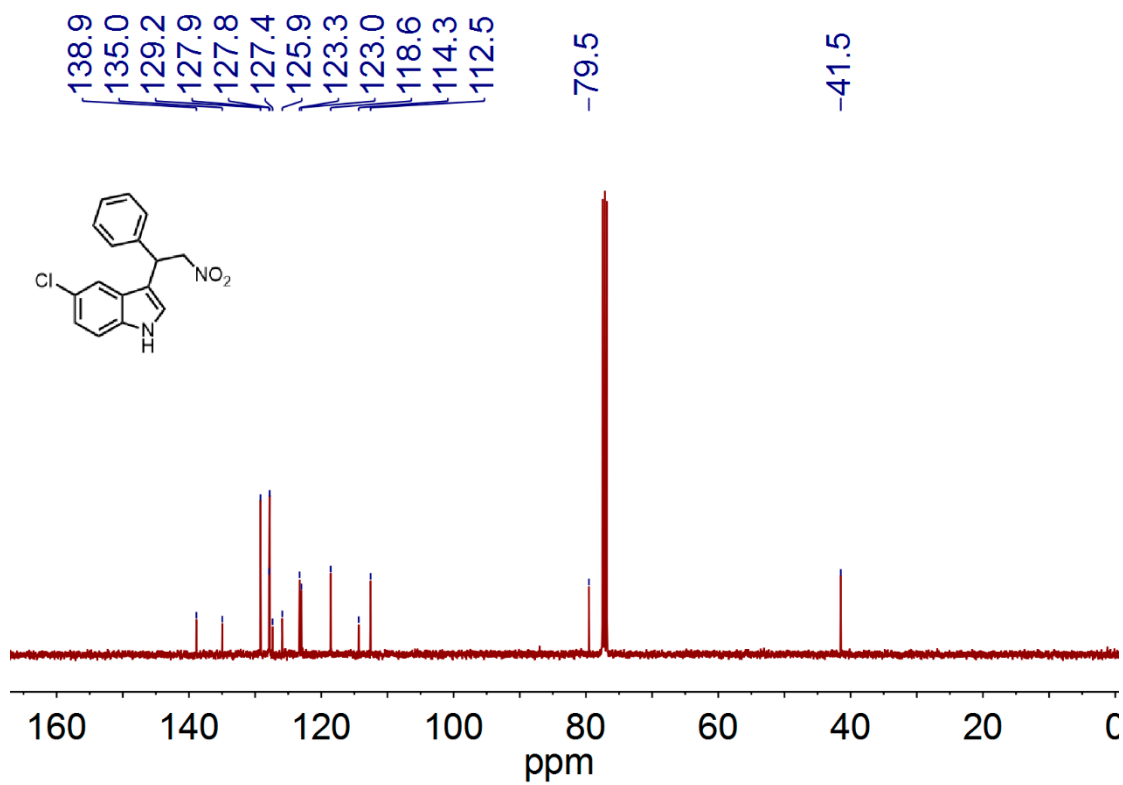

<sup>13</sup>C NMR Spectrum of Compound **3da**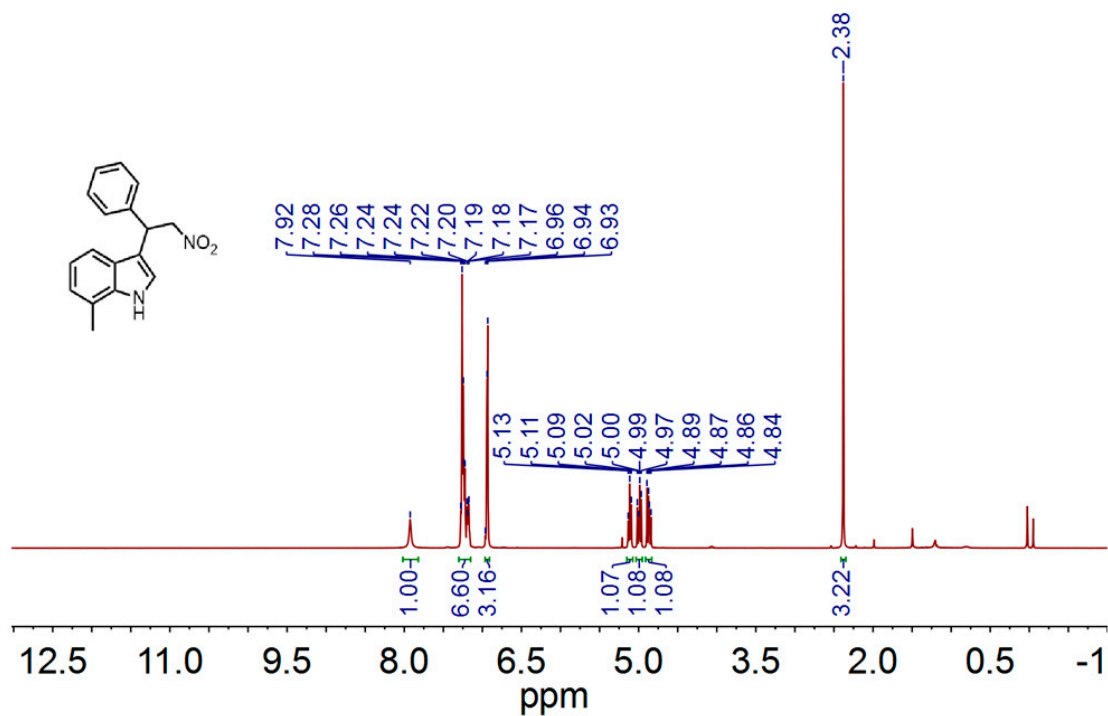<sup>1</sup>H NMR Spectrum of Compound **3ea**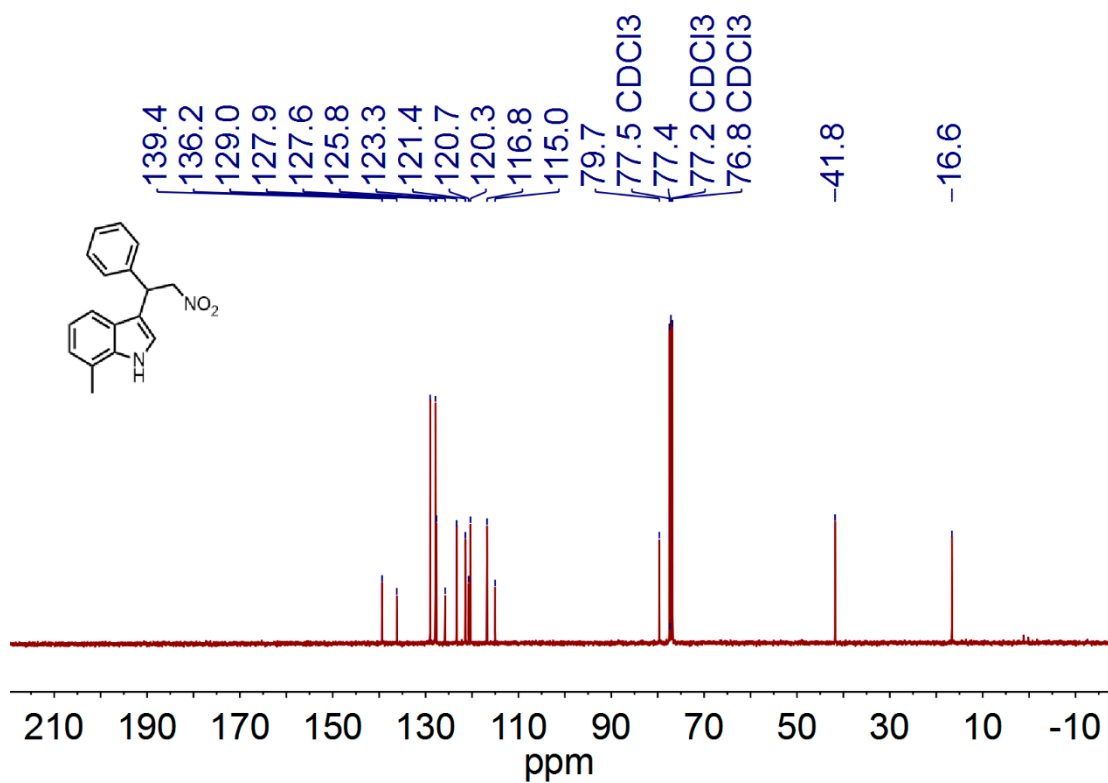<sup>13</sup>C NMR Spectrum of Compound **3ea**

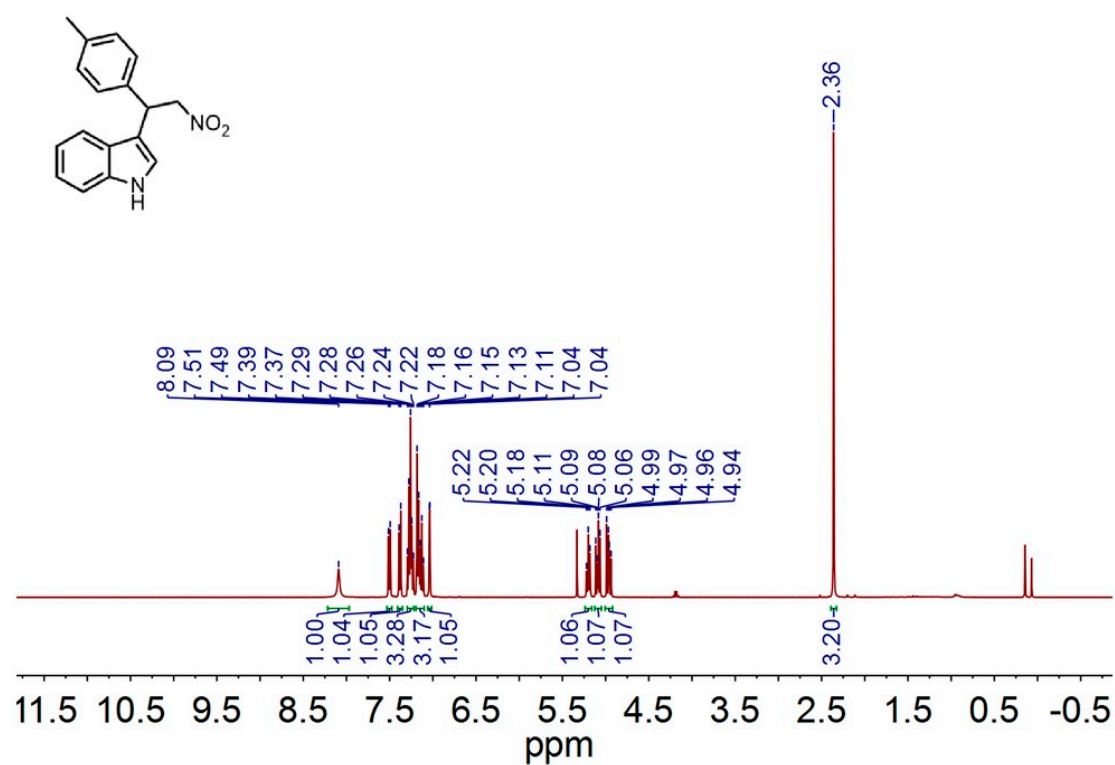<sup>1</sup>H NMR Spectrum of Compound **3ab**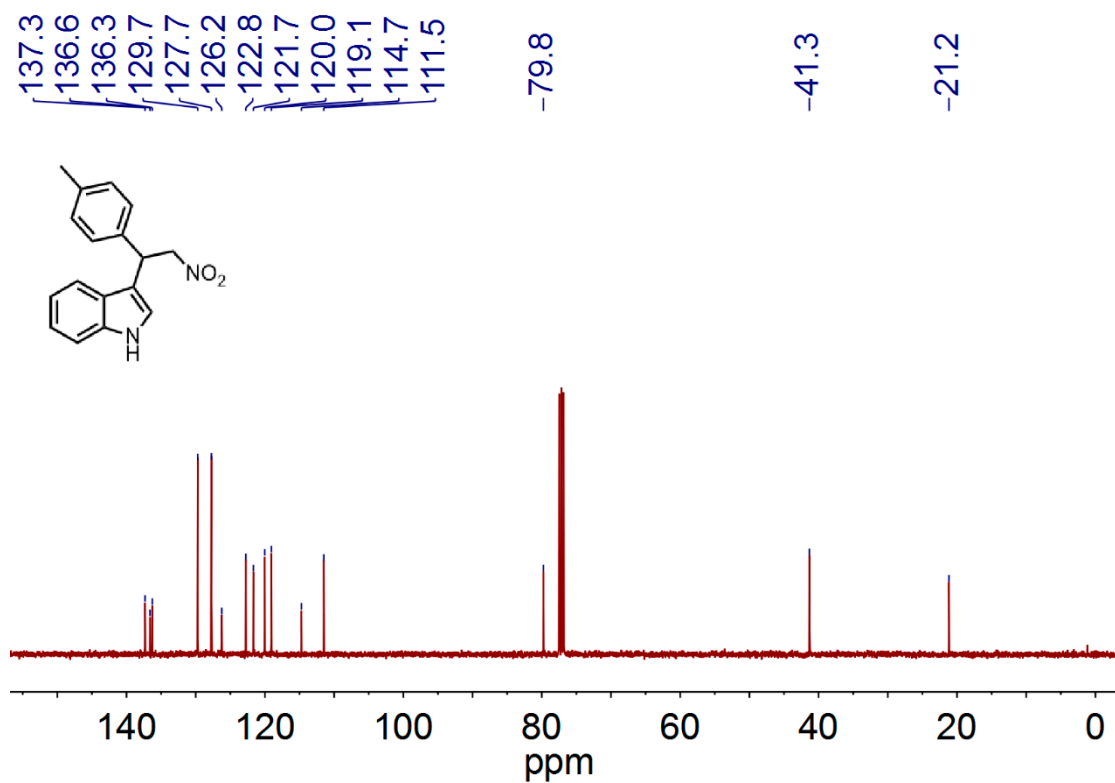<sup>13</sup>C NMR Spectrum of Compound **3ab**

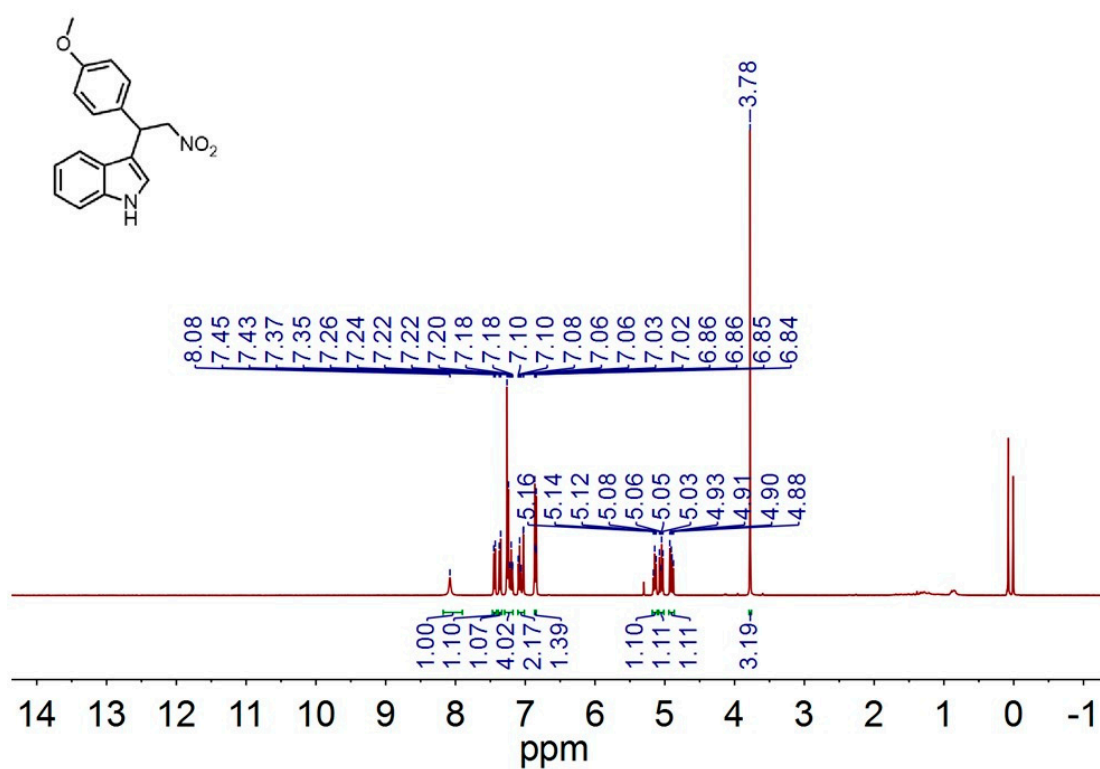<sup>1</sup>H NMR Spectrum of Compound **3ac**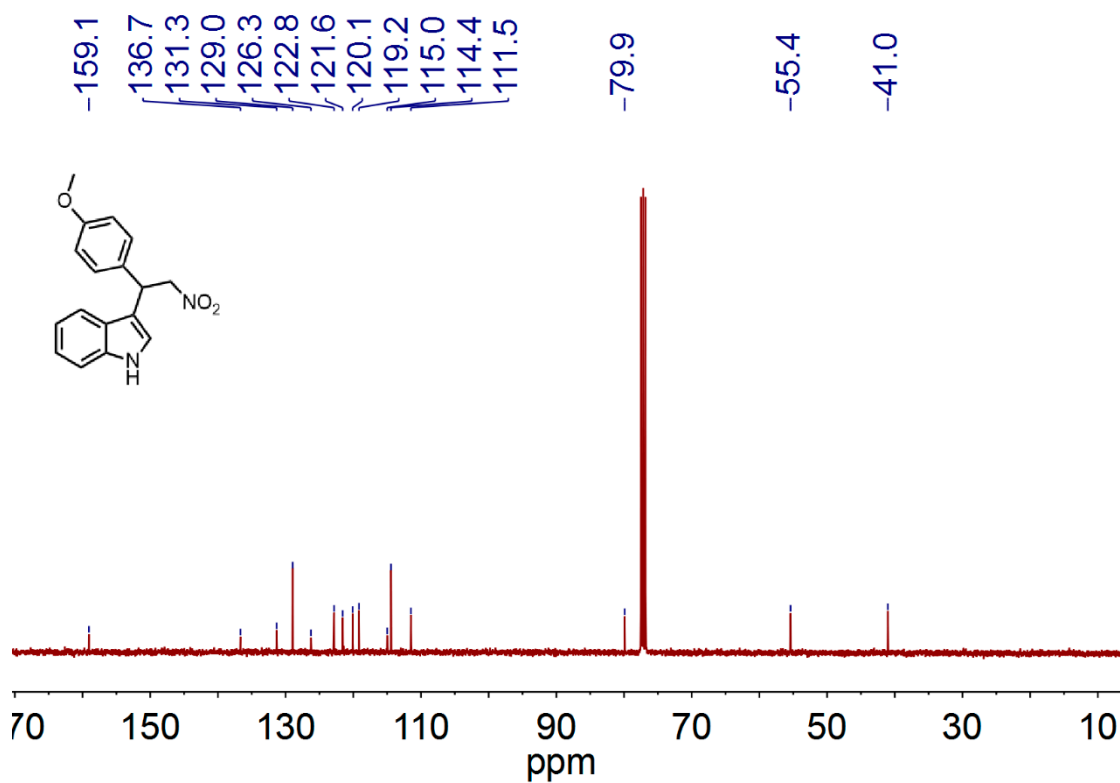<sup>13</sup>C NMR Spectrum of Compound **3ac**

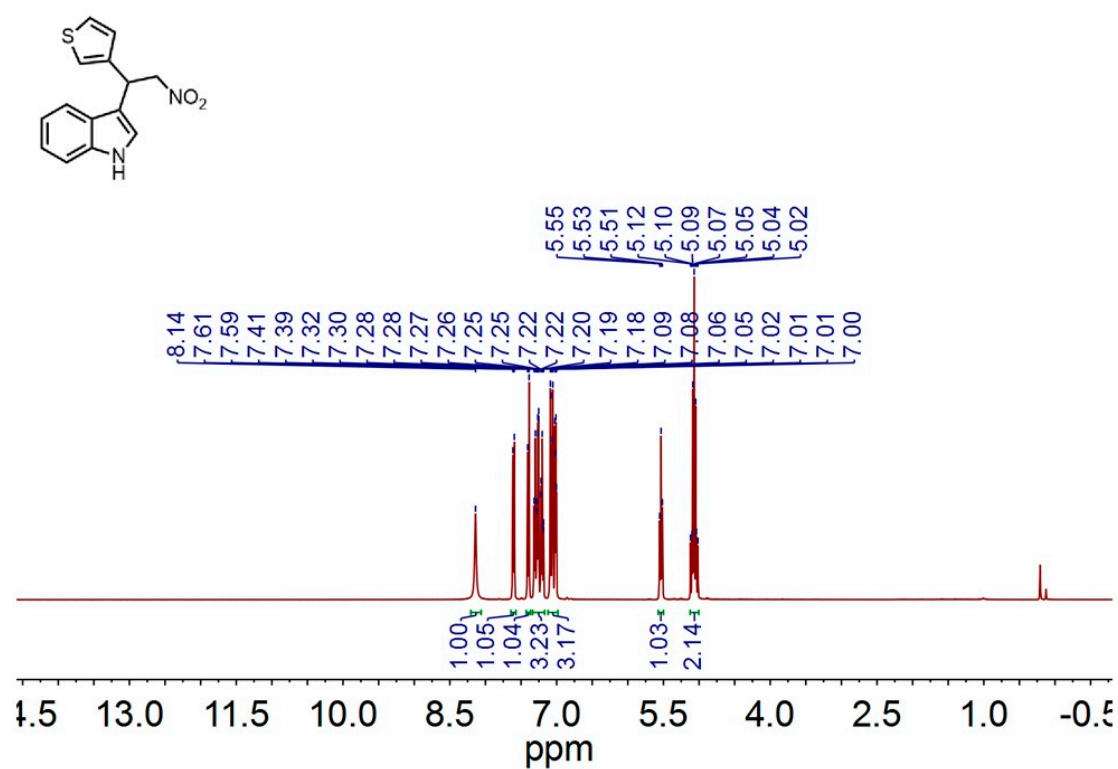<sup>1</sup>H NMR Spectrum of Compound **3ad**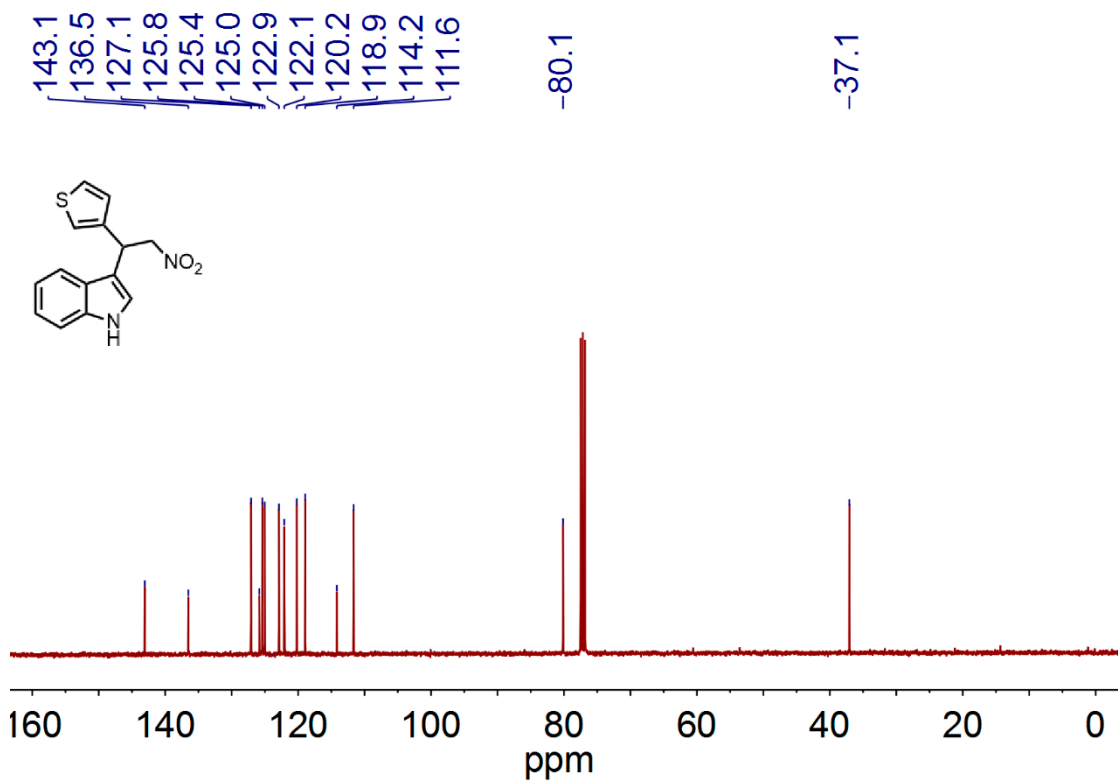<sup>13</sup>C NMR Spectrum of Compound **3ac**

## X-ray crystal structure of TPAC-Cl

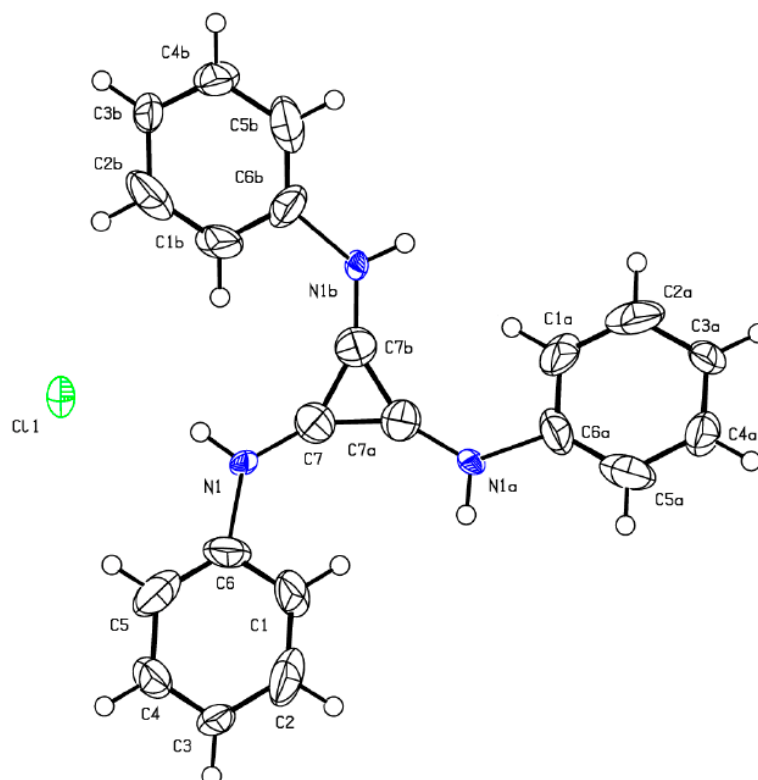Table S1. Crystal data and structure refinement for TPAC-Cl<sup>8</sup>.

| complex                                       | 1                                                |
|-----------------------------------------------|--------------------------------------------------|
| Formula                                       | C <sub>21</sub> H <sub>18</sub> ClN <sub>3</sub> |
| Formula weight                                | 347.83                                           |
| Crystal system                                | Cubic                                            |
| space group                                   | <i>P</i> 213                                     |
| <i>a</i> (Å)                                  | 13.484(8)                                        |
| <i>b</i> (Å)                                  | 13.484(8)                                        |
| <i>c</i> (Å)                                  | 13.484(8)                                        |
| $\alpha$ (°)                                  | 90                                               |
| $\beta$ (°)                                   | 90                                               |
| $\gamma$ (°)                                  | 90                                               |
| Volume(Å <sup>3</sup> )                       | 2451.6(4)                                        |
| <i>Z</i>                                      | 4                                                |
| <i>T</i> (K)                                  | 296(2)                                           |
| <i>D</i> <sub>calcd</sub> (g/m <sup>3</sup> ) | 1.573                                            |
| <i>F</i> (000)                                | 728                                              |
| Reflections collected                         | 2045                                             |
| Unique reflections                            | 1846                                             |
| Goof                                          | 1.140                                            |

|                       |                     |
|-----------------------|---------------------|
| $R_1[ > 2\sigma(I)]$  | 0.1082              |
| $wR_2[ > 2\sigma(I)]$ | 0.3079 <sup>a</sup> |
| CCDC NO.              | 1509942             |

$$^a w = 1/[\sigma^2(F_o)^2 + (0.1820P)^2 + 3.4136P], \text{ where } P = (F_o^2 + 2F_c^2)/3;$$

## Reference

1. Herrera, R. P.; Sgarzani, V.; Bernardi, L.; Ricci, A., Catalytic enantioselective Friedel–Crafts alkylation of indoles with nitroalkenes by using a simple thiourea organocatalyst. *Angew. Chem. Int. Ed.* **2005**, *44*, 6576–6579.
2. Zhuang, W.; Hazell, R. G.; Jorgensen, K. A., Enantioselective Friedel–Crafts type addition of indoles to nitro-olefins using a chiral hydrogen-bonding catalyst–synthesis of optically active tetrahydro-beta-carbolines. *Org. Biomol. Chem.* **2005**, *3*, 2566–2571.
3. Fleming, E. M.; McCabe, T.; Connon, S. J., Novel axially chiral bis-arylthiourea-based organocatalysts for asymmetric Friedel–Crafts type reactions. *Tetrahedron Lett.* **2006**, *47*, 7037–7042.
4. Itoh, J.; Fuchibe, K.; Akiyama, T., Chiral phosphoric acid catalyzed enantioselective Friedel–Crafts alkylation of indoles with nitroalkenes: cooperative effect of 3 Å molecular sieves. *Angew. Chem. Int. Ed.* **2008**, *47*, 4016–4018.
5. Huang, K.; Pei, X.; Yin, X.; Chen, Z., Novel Chiral Secondary Amine–Amide Catalysts Friedel–Craft Alkylation Reaction. *Asian J. Chem.* **2017**, *29*, 595–600.
6. Suzuki, T.; Chisholm, J. D., Friedel–Crafts Alkylation of Indoles with Trichloroacetimidates. *Tetrahedron Lett.* **2019**, *60*, 1325–1329.
7. DüNDAR, E.; Tanyeli, C., Enantioselective Friedel–Crafts alkylation of indole with nitroalkenes in the presence of bifunctional squaramide organocatalysts. *Tetrahedron Lett.* **2021**, *73*, 153153.
8. Xu, J.; Liu, J.; Li, Z.; Xu, S.; Wang, H.; Guo, T.; Gao, Y.; Zhang, L.; Zhang, C.; Guo, K., Opposite-charge repulsive cation and anion pair cooperative organocatalysis in ring-opening polymerization. *Polym. Chem.* **2018**, *9*, 2183–2192.
